# Supplementary material for: Bayesian posteriors for arbitrarily rare events
Source: HighWire-hosted journal article supplement (doi:10.1073/pnas.1618780114), 2017-04-25
Supplement: pnas.1618780114.sapp.pdf [file pnas.1618780114.sapp.pdf]

# SI Appendix for Bayesian Posteriors For Arbitrarily Rare Events

Drew Fudenberg, Kevin He, and Lorens A. Imhof

This appendix contains omitted proofs. Before we prove Theorem 1 we prove Proposition 1 and then state and prove a simple consequence of Chernoff's inequality. Both results are needed in the proof of Theorem 1.

*Proof of Proposition 1.* The assumption that  $\pi(p)/\prod_{i=1}^K p_i^{\alpha_i-1}$  is uniformly continuous on  $\text{int } \Delta$  implies that the function has a continuous extension  $\tilde{\pi} : \Delta \rightarrow \mathbb{R}$ , see [1], Theorem 5.2, page 302. Let  $\tilde{\pi}_0 = \min\{\tilde{\pi}(p) : p \in \Delta\}$ . Then  $\tilde{\pi}_0 > 0$ . Given  $\epsilon > 0$ , choose  $\delta \in (0, \tilde{\pi}_0)$  so small that

$$(12) \quad \frac{1 + \frac{\delta}{\tilde{\pi}_0}}{1 - \frac{\delta}{\tilde{\pi}_0}} \leq 1 + \epsilon.$$

To approximate the integrals in the assertion by sums of Dirichlet integrals we use the fact that the continuous function  $\tilde{\pi}$  can be uniformly approximated by Bernstein polynomials, see [2], pages 6 and 51. Thus, there is a polynomial

$$h(p) = \sum_{\substack{\nu_1, \dots, \nu_K \geq 0 \\ \nu_1 + \dots + \nu_K = m}} c_\nu \prod_{i=1}^K p_i^{\nu_i}, \quad c_\nu = \tilde{\pi} \left( \frac{\nu_1}{m}, \dots, \frac{\nu_K}{m} \right) \frac{m!}{\nu_1! \dots \nu_K!},$$

so that

$$|\tilde{\pi}(p) - h(p)| \leq \delta, \quad p \in \Delta.$$

Using the formula

$$\int \prod_{i=1}^K p_i^{s_i-1} d\lambda(p) = \frac{\prod_{i=1}^K \Gamma(s_i)}{\Gamma(\sum_{i=1}^K s_i)}, \quad s_1, \dots, s_K > 0,$$

and the relation  $\Gamma(s+1) = s\Gamma(s)$ , we get

$$\frac{\int p_k \left( \prod_{i=1}^K p_i^{s_i-1} \right) h(p) d\lambda(p)}{\int \left( \prod_{i=1}^K p_i^{s_i-1} \right) h(p) d\lambda(p)} = \frac{1}{m + \sum_{i=1}^K s_i} \frac{\sum_\nu c_\nu (\nu_k + s_k) \prod_{i=1}^K \Gamma(\nu_i + s_i)}{\sum_\nu c_\nu \prod_{i=1}^K \Gamma(\nu_i + s_i)}.$$

Since  $c_\nu > 0$  for every  $\nu$ , it follows that

$$(13) \quad \frac{s_k}{m + \sum_{i=1}^K s_i} \leq \frac{\int p_k \left( \prod_{i=1}^K p_i^{s_i-1} \right) h(p) d\lambda(p)}{\int \left( \prod_{i=1}^K p_i^{s_i-1} \right) h(p) d\lambda(p)} \leq \frac{m + s_k}{m + \sum_{i=1}^K s_i}.$$

For all  $p \in \Delta$ ,  $h(p) \geq \tilde{\pi}_0$ , and so  $|\tilde{\pi}(p) - h(p)| \leq \delta \leq \frac{\delta}{\tilde{\pi}_0} h(p)$ . Thus,

$$\left( 1 - \frac{\delta}{\tilde{\pi}_0} \right) h(p) \leq \tilde{\pi}(p) \leq \left( 1 + \frac{\delta}{\tilde{\pi}_0} \right) h(p).$$

It follows from these inequalities together with (12) and (13) that for  $n, n_1, \dots, n_K \in \mathbb{N}_0$  with  $\sum_{i=1}^K n_i = n$ ,

$$\begin{aligned} \frac{\int p_k \left( \prod_{i=1}^K p_i^{n_i} \right) \pi(p) d\lambda(p)}{\int \left( \prod_{i=1}^K p_i^{n_i} \right) \pi(p) d\lambda(p)} &= \frac{\int p_k \left( \prod_{i=1}^K p_i^{n_i + \alpha_i - 1} \right) \tilde{\pi}(p) d\lambda(p)}{\int \left( \prod_{i=1}^K p_i^{n_i + \alpha_i - 1} \right) \tilde{\pi}(p) d\lambda(p)} \\ &\leq \frac{1 + \frac{\delta}{\tilde{\pi}_0} \int p_k \left( \prod_{i=1}^K p_i^{n_i + \alpha_i - 1} \right) h(p) d\lambda(p)}{1 - \frac{\delta}{\tilde{\pi}_0} \int \left( \prod_{i=1}^K p_i^{n_i + \alpha_i - 1} \right) h(p) d\lambda(p)} \\ &\leq (1 + \epsilon) \frac{m + n_k + \alpha_k}{m + n + \sum_{i=1}^K \alpha_i}. \end{aligned}$$

Similarly, using the inequality  $1/(1 + \epsilon) > 1 - \epsilon$ , we obtain

$$\begin{aligned} \frac{\int p_k \left( \prod_{i=1}^K p_i^{n_i} \right) \pi(p) d\lambda(p)}{\int \left( \prod_{i=1}^K p_i^{n_i} \right) \pi(p) d\lambda(p)} &\geq \frac{1 - \frac{\delta}{\tilde{\pi}_0} \int p_k \left( \prod_{i=1}^K p_i^{n_i + \alpha_i - 1} \right) h(p) d\lambda(p)}{1 + \frac{\delta}{\tilde{\pi}_0} \int \left( \prod_{i=1}^K p_i^{n_i + \alpha_i - 1} \right) h(p) d\lambda(p)} \\ &\geq (1 - \epsilon) \frac{n_k + \alpha_k}{m + n + \sum_{i=1}^K \alpha_i}. \end{aligned}$$

The assertion follows with  $\gamma = m + \sum_{i=1}^K \alpha_i$ .  $\square$

**Remark 3'.** Using results on the degree of approximation by Bernstein polynomials, one may compute explicit values for the constant  $\gamma$  in Proposition 1. If, for example,  $K = 2$  and  $\phi(p_1) = \tilde{\pi}(p_1, 1 - p_1)$  has a continuous derivative on  $[0, 1]$ , one can apply Theorem 1.6.1 in [2] to show that (3) holds with

$$\gamma = \alpha_1 + \alpha_2 + \left[ \frac{5}{4} \left( 1 + \frac{2}{\epsilon} \right) \frac{\max\{|\phi'(p_1)| : 0 \leq p_1 \leq 1\}}{\min\{\phi(p_1) : 0 \leq p_1 \leq 1\}} \right]^2.$$

If  $K \geq 2$  and  $\tilde{\pi}$  coincides with a polynomial on  $\Delta$ , then, by a result of [3],  $\pi$  can be written as a finite mixture of densities of Dirichlet distributions and Theorem 3 of [4] gives a computable upper bound on the support of the mixing distribution. Thus, the inequalities in (4) hold with computable constants  $a$  and  $A$ .

**Lemma 3.** *Let  $S_n$  be a binomial random variable with parameters  $n$  and  $p$ . Let  $1 < c < 2$  and  $d > 0$ . Then*

$$\mathbb{P} \left( \frac{S_n}{n} \geq cp + \frac{d}{n} \right) \leq e^{(1-c)d}, \quad \mathbb{P} \left( \frac{S_n}{n} \leq \frac{p}{c} - \frac{d}{n} \right) \leq e^{(1-c)d}.$$

*Proof.* By Chernoff's inequality,

$$\mathbb{P} \left( \frac{S_n}{n} \geq cp + \frac{d}{n} \right) \leq \inf_{t > 0} \left[ e^{-t(cp + \frac{d}{n})} (1 - p + pe^t) \right]^n \leq e^{(1-c)d} [\psi(p)]^n,$$

where  $\psi(s) = e^{(1-c)cs}(1 - s + se^{c-1})$ . For  $0 \leq s \leq 1$ ,

$$\frac{\psi'(s)}{e^{(1-c)cs}} = e^{c-1} - 1 - (c-1)c - s(c-1)c(e^{c-1} - 1) \leq e^{c-1} - 1 - (c-1)c.$$

Set  $\phi(u) = e^{u-1} - 1 - (u-1)u$ . The function  $\phi'$  is convex,  $\phi'(1) = 0$  and  $\phi'(2) < 0$ . Thus,  $\phi'$  is negative on  $(1, 2)$ , so that  $\phi(c) < \phi(1) = 0$ . It now follows that  $\psi$  is decreasing on  $[0, 1]$ , so that  $\psi(p) \leq \psi(0) = 1$ . This proves the first claim. The proof of the second claim is similar.  $\square$

*Proof of Theorem 1.* Let  $0 < \epsilon < 1$ . Choose  $c \in (1, 2)$  and  $\delta > 0$  so that

$$\frac{1-\delta}{c} > 1 - \frac{\epsilon}{2}, \quad (1+\delta)c < 1 + \frac{\epsilon}{2}.$$

Let  $d > 0$  be so that the bound in Lemma 3 satisfies  $e^{(1-c)d} < \frac{\epsilon}{2}$ . By Proposition 1, there exists  $\gamma > 0$  so that for every  $n \in \mathbb{N}$ ,

$$(1-\delta)\frac{X_k^n}{n+\gamma} \leq \hat{p}_k(X^n) \leq (1+\delta)\frac{X_k^n + \gamma}{n}, \quad k = 1, \dots, K.$$

Let  $N$  be so large that

$$(1-\delta)\left(\frac{1}{c} - \frac{d}{N}\right)\frac{1}{1+\gamma/N} > 1 - \epsilon, \quad (1+\delta)\frac{d+\gamma}{N} < \frac{\epsilon}{2}.$$

Fix  $k$ ,  $p_k$  and  $n$  with  $np_k \geq N$ . Set  $A = \{\frac{1}{n}X_k^n < cp_k + \frac{d}{n}\}$  and  $B = \{\frac{1}{n}X_k^n > \frac{p_k}{c} - \frac{d}{n}\}$ . On  $A$ ,

$$\frac{\hat{p}_k(X^n)}{p_k} \leq (1+\delta)\frac{X_k^n + \gamma}{np_k} \leq (1+\delta)\left(c + \frac{d+\gamma}{np_k}\right) \leq (1+\delta)\left(c + \frac{d+\gamma}{N}\right) < 1 + \epsilon$$

and on  $B$ ,

$$\begin{aligned} \frac{\hat{p}_k(X^n)}{p_k} &\geq (1-\delta)\frac{X_k^n}{np_k} \frac{n}{n+\gamma} \geq (1-\delta)\left(\frac{1}{c} - \frac{d}{np_k}\right)\frac{1}{1+\gamma/n} \\ &\geq (1-\delta)\left(\frac{1}{c} - \frac{d}{N}\right)\frac{1}{1+\gamma/N} > 1 - \epsilon. \end{aligned}$$

By Lemma 3,  $\mathbb{P}_p(A \cap B) \geq 1 - \mathbb{P}_p(A^c) - \mathbb{P}_p(B^c) \geq 1 - \epsilon$ .  $\square$

**Remark 3''.** In the proof of Theorem 1 one can choose  $c = 1 + \frac{\epsilon}{4}$ ,  $\delta = \frac{\epsilon}{5}$ , and  $d = 3\epsilon^{-2}$ . If the prior-dependent constant  $\gamma > 0$  is so chosen that the inequalities in (3) hold with  $\epsilon$  replaced by  $\frac{\epsilon}{5}$ , then it follows by a small variation of the above proof that the conclusion of Theorem 1 holds for  $N = 8\epsilon^{-3} + 3\gamma\epsilon^{-1}$ .

The proof of Example 1 uses the following lower bound for the Bayes estimates of  $p_1$ .

**Lemma 4.** Let  $\pi(p) = e^{-1/p}$ ,  $0 < p \leq 1$ . Then

$$\frac{\int_0^1 p^{\nu+1}(1-p)^{n-\nu}\pi(p) dp}{\int_0^1 p^\nu(1-p)^{n-\nu}\pi(p) dp} \geq \frac{1}{8\sqrt{1 \vee n}}$$

for every  $n \in \mathbb{N}_0$  and  $\nu = 0, \dots, n$ .

*Proof.* Let  $U$  be a random variable with density proportional to  $p^\nu(1-p)^{n-\nu}\pi(p)$  and let  $V$  be a random variable with density proportional to  $(1-p)^n\pi(p)$ ,  $0 < p < 1$ . Then  $U$  is larger than  $V$  in the likelihood ratio order since  $p^\nu(1-p)^{n-\nu}\pi(p)/[(1-p)^n\pi(p)] = (p/(1-p))^\nu$  is increasing in  $p$ . This implies that  $\mathbb{E}(U) \geq \mathbb{E}(V)$ , that is,

$$\frac{\int_0^1 p^{\nu+1}(1-p)^{n-\nu}\pi(p) dp}{\int_0^1 p^\nu(1-p)^{n-\nu}\pi(p) dp} \geq \frac{\int_0^1 p(1-p)^n\pi(p) dp}{\int_0^1 (1-p)^n\pi(p) dp},$$

see [5], page 70. It is therefore enough to prove the claim for  $\nu = 0$ .

Let  $f_n(p) = c_n(1-p)^n\pi(p)$ , where  $c_n = [\int_0^1 (1-p)^n\pi(p) dp]^{-1}$ . We have

$$f'_n(p) = c_n \frac{e^{-1/p}(1-p)^{n-1}}{p^2} (1-p-np^2),$$

showing that  $f_n$  is increasing on  $[0, 2a_n]$ , where  $a_n = 1/(4\sqrt{1 \vee n})$ . Hence

$$\frac{\int_{a_n}^1 f_n(p) dp}{1 - \int_{a_n}^1 f_n(p) dp} = \frac{\int_{a_n}^1 f_n(p) dp}{\int_0^{a_n} f_n(p) dp} \geq \frac{\int_{a_n}^{2a_n} f_n(p) dp}{a_n f_n(a_n)} \geq \frac{(2a_n - a_n)f(a_n)}{a_n f_n(a_n)} = 1.$$

Thus  $\int_{a_n}^1 f_n(p) dp \geq \frac{1}{2}$ , and therefore

$$\int_0^1 p f_n(p) dp \geq \int_{a_n}^1 p f_n(p) dp \geq a_n \int_{a_n}^1 f_n(p) dp \geq \frac{1}{2} a_n = \frac{1}{8\sqrt{1 \vee n}}. \quad \square$$

*Proof of Example 1.* Let  $N \in \mathbb{N}$ . For  $n > N^2$  define  $p(n) \in \Delta$  by  $p_1(n) = Nn^{-\frac{1}{2}-\delta}$ . By Lemma 4,  $\hat{p}_1(X^n) - 2p_1(n) \geq n^{-\frac{1}{2}}(\frac{1}{8} - 2Nn^{-\delta})$ , and so, for  $n$  sufficiently large,  $\mathbb{P}_{p(n)}(|\hat{p}_1(X^n) - p_1(n)| > p_1(n)) = 1$ .  $\square$

*Proof of Example 2.* Suppose  $\pi$  satisfies Condition  $\mathcal{P}(\alpha)$ ,  $\alpha \in (0, \infty)^K$ . By Proposition 1, there exists  $\gamma > 0$  so that  $\hat{p}_1(X^n) \geq \alpha_1/[2(n + \gamma)]$ . For every  $n > \alpha_1/8$  pick  $p(n) \in \Delta$  with  $p_1(n) = \alpha_1/(8n)$ . Let  $n_0 = \max(\alpha_1/8, \gamma)$ . If  $n > n_0$ , then  $\alpha_1/[2(n + \gamma)] > 2p_1(n)$ , and so  $\mathbb{P}_{p(n)}(|\hat{p}_1(X^n) - p_1(n)| > p_1(n)) = 1$ . Since  $\limsup_{n \rightarrow \infty} \zeta(n)/n = \infty$ , there exists for every  $N \in \mathbb{N}$  an  $n > n_0$  with  $\zeta(n)p_1(n) \geq N$ .  $\square$

The following result was used in Remark 4.

**Proposition 2.** Let  $K > 2$  and  $\bar{k} \in \{1, \dots, K\}$ . Suppose the density  $\pi$  of the prior distribution on  $\Delta$  satisfies Condition  $\mathcal{P}(\alpha_1, \dots, \alpha_K)$  with  $\alpha_1, \dots, \alpha_K > 0$ . Then the image measure induced by the mapping  $(p_1, \dots, p_K) \mapsto (p_{\bar{k}}, \sum_{k \neq \bar{k}} p_k)$  has a density that satisfies Condition  $\mathcal{P}(\alpha_{\bar{k}}, \sum_{k \neq \bar{k}} \alpha_k)$ .

*Proof.* Suppose without loss of generality that  $\bar{k} = 1$ . Then the image measure has a density  $\pi_1$  with respect to the normalized Lebesgue measure on  $\Delta_1 = \{q \in [0, 1]^2 : q_1 + q_2 = 1\}$  which is given by

$$\pi_1(q) = \int_{A(q_2)} \pi \left( q_1, p_2, \dots, p_{K-1}, q_2 - \sum_{k=2}^{K-1} p_k \right) d(p_2, \dots, p_{K-1}),$$

where

$$A(q_2) = \{(p_2, \dots, p_{K-1}) \in (0, 1)^{K-2} : p_2 + \dots + p_{K-1} < q_2\}.$$

Making the change of variable  $t = (t_2, \dots, t_{K-1}) = q_2^{-1}(p_2, \dots, p_{K-1})$  we get

$$\pi_1(q) = q_2^{K-2} \int_{A(1)} \pi \left( q_1, q_2 t, q_2 \left( 1 - \sum_{k=2}^{K-1} t_k \right) \right) dt$$

for  $q \in \Delta_1$  with  $q_2 > 0$ . Since  $\pi$  satisfies Condition  $\mathcal{P}(\alpha_1, \dots, \alpha_K)$ , there exists a continuous positive function  $\tilde{\pi}$  on  $\Delta$  such that  $\tilde{\pi}(p) = \pi(p) / \prod_{k=1}^K p_k^{\alpha_k - 1}$  for all  $p \in \text{int } \Delta$ . Hence, for  $q \in \text{int } \Delta_1$ ,

$$\begin{aligned} & \frac{\pi_1(q)}{q_1^{\alpha_1 - 1} q_2^{(\sum_{k=2}^K \alpha_k) - 1}} \\ &= \int_{A(1)} \tilde{\pi} \left( q_1, q_2 t, q_2 \left( 1 - \sum_{k=2}^{K-1} t_k \right) \right) \prod_{k=2}^{K-1} t_k^{\alpha_k - 1} \left( 1 - \sum_{k=2}^{K-1} t_k \right)^{\alpha_K - 1} dt. \end{aligned}$$

The integral is positive for every  $q \in \Delta_1$  and, by dominated convergence, depends continuously on  $q \in \Delta_1$ . Thus,  $\pi_1$  satisfies Condition  $\mathcal{P}(\alpha_1, \alpha_2 + \dots + \alpha_K)$ .  $\square$

*Proof of Example 3.* Let  $N \in \mathbb{N}$ . For every  $n \geq \max(N, \frac{N}{c})$  let  $p(n) = (\frac{N}{n}, 1 - \frac{N}{n})$ ,  $q(n) = (\frac{N}{cn}, 1 - \frac{N}{cn})$ ,  $\vartheta_n = (p(n), q(n))$ , and

$$A_n = \left\{ \hat{p}_1(X^n) \geq \frac{c}{2} \hat{q}_1(X^n) \right\}.$$

We will prove more than is stated, namely that  $\mathbb{P}_{\vartheta_n}(A_n) \rightarrow 0$  as  $n \rightarrow \infty$ . Let  $Y_n$  denote the number of times the blue die lands on side 1 in the first  $n$  periods. By Proposition 1, there exists  $\gamma > 0$  so that  $\hat{p}_1(X^n) \leq \frac{3}{2}(Y_n + \gamma)/(B_n + \gamma)$ . For every  $n \geq \max(N, \frac{N}{c})$  and  $b \in \{0, 1, \dots, n\}$ , by Lemma 4,

$$\mathbb{P}_{\vartheta_n}(A_n | B_n = b) \leq \mathbb{P}_{\vartheta_n} \left( \frac{3}{2} \frac{Y_n + \gamma}{b + \gamma} \geq \frac{c}{16\sqrt{1 \vee (n - b)}} \middle| B_n = b \right).$$

If  $b > \frac{n}{2}\mu_B$ , then  $c(b + \gamma)/(24\sqrt{1 \vee (n - b)}) \geq d\sqrt{n}$  with  $d := c\mu_B/(48\sqrt{1 - \mu_B/2})$ , and it follows that

$$\mathbb{P}_{\vartheta_n}(A_n | B_n = b) \leq \mathbb{P}_{\vartheta_n}(Y_n \geq -\gamma + d\sqrt{n} | B_n = b).$$

To bound the probability on the right-hand side we use a Poisson approximation to the conditional distribution of  $Y_n$ . Let  $W_\nu$  be a Poisson random variable with mean  $\nu$ . Then, by [6], (43) on page 89,

$$\begin{aligned}\mathbb{P}_{\vartheta_n}(Y_n \geq -\gamma + d\sqrt{n}|B_n = b) &\leq \mathbb{P}(W_{bp_1(n)} \geq -\gamma + d\sqrt{n}) + p_1(n) \\ &\leq \mathbb{P}(W_N \geq -\gamma + d\sqrt{n}) + \frac{N}{n}.\end{aligned}$$

In the second line we used the fact that  $W_N$  is stochastically larger than  $W_{bp_1(n)}$  because  $N \geq bp_1(n)$ , see [5], pages 67-70. Hence

$$\begin{aligned}\mathbb{P}_{\vartheta_n}(A_n) &\leq \mathbb{P}_{\vartheta_n}\left(B_n \leq \frac{n}{2}\mu_B\right) + \sum_{b:b > \frac{n}{2}\mu_B} \mathbb{P}_{\vartheta_n}(A_n|B_n = b)\mathbb{P}_{\vartheta_n}(B_n = b) \\ &\leq \mathbb{P}_{\vartheta_n}\left(\frac{1}{n}B_n \leq \frac{1}{2}\mu_B\right) + \mathbb{P}(W_N \geq -\gamma + d\sqrt{n}) + \frac{N}{n}.\end{aligned}$$

As  $n \rightarrow \infty$ ,  $\mathbb{P}(W_N \geq -\gamma + d\sqrt{n}) \rightarrow 0$  and, by the weak law of large numbers,  $\mathbb{P}_{\vartheta_n}(\frac{1}{n}B_n \leq \frac{1}{2}\mu_B) \rightarrow 0$ . Thus,  $\mathbb{P}_{\vartheta_n}(A_n) \rightarrow 0$  as  $n \rightarrow \infty$ .  $\square$

*Proof of Example 4.* Let  $Y_n$  and  $Z_n$  be the respective number of times the blue and the red die land on side 1 in the first  $n$  periods. By Proposition 1, there exists  $\gamma > 0$  so that

$$\begin{aligned}\mathbb{P}_{\vartheta}\left(\hat{p}_1(X^n) < \frac{c}{2}\hat{q}_1(X^n)\right) &\geq \mathbb{P}_{\vartheta}\left(\frac{3}{2}\frac{Y_n + \gamma}{B_n + \gamma} < \frac{c}{4}\frac{Z_n}{n + \gamma}\right) \\ &\geq \mathbb{P}_{\vartheta}\left(Y_n = 0, \frac{6\gamma}{c} < \frac{B_n}{n}Z_n\right).\end{aligned}$$

For every  $n \in \mathbb{N}$  with  $n \geq c$  pick  $\vartheta_n = (p(n), q(n)) \in \Delta^2$  with  $p_1(n) = \frac{c}{n}$  and  $q_1(n) = \frac{1}{n}$ . Let  $\mu_0 \in (0, \mu_B)$  and  $\mu_1 \in (\mu_B, 1)$ . Then, for  $b = \lceil \mu_0 n \rceil, \dots, \lfloor \mu_1 n \rfloor$ ,

$$\mathbb{P}_{\vartheta_n}\left(Y_n = 0, \frac{6\gamma}{c} < \frac{B_n}{n}Z_n \mid B_n = b\right) \geq [1 - p_1(n)]^n \mathbb{P}_{\vartheta_n}\left(\frac{6\gamma}{c\mu_0} < Z_n \mid B_n = \lfloor \mu_1 n \rfloor\right).$$

Now  $[1 - p_1(n)]^n \rightarrow e^{-c} > 0$  and, by [6], (43) on page 89,

$$\mathbb{P}_{\vartheta_n}\left(\frac{6\gamma}{c\mu_0} < Z_n \mid B_n = \lfloor \mu_1 n \rfloor\right) \geq \mathbb{P}\left(W > \frac{6\gamma}{c\mu_0}\right) - \frac{1}{n},$$

where  $W$  is a Poisson random variable with mean  $1 - \mu_1$ . Hence

$$\liminf_{n \rightarrow \infty} \mathbb{P}_{\vartheta_n}\left(Y_n = 0, \frac{6\gamma}{c} < \frac{B_n}{n}Z_n \mid \mu_0 n \leq B_n \leq \mu_1 n\right) > 0.$$

Since  $\mathbb{P}(\mu_0 n \leq B_n \leq \mu_1 n) \rightarrow 1$ , it follows that there exists  $\epsilon_0 > 0$  and  $n_0 \in \mathbb{N}$  so that

$$\mathbb{P}_{\vartheta_n}\left(\hat{p}_1(X^n) < \frac{c}{2}\hat{q}_1(X^n)\right) > \epsilon_0$$

for all  $n \geq n_0$ . Since  $\zeta(p_1(n))/p_1(n) \rightarrow \infty$  as  $n \rightarrow \infty$ , there exists for every  $N \in \mathbb{N}$  an  $n \geq n_0$  with  $n\zeta(p_1(n)) \geq N$  and  $\vartheta_n$  has the required properties.  $\square$

*Proof of Lemma 1.* Set  $\ell = d/(n \wedge m)$ . By Markov's inequality, for every  $t > 0$ ,

$$(14) \quad \mathbb{P}\left(\frac{T_m}{m} \geq \frac{1}{c'} \frac{S_n}{n} + \ell\right) = \mathbb{P}\left(e^{t(c'T_m - \frac{m}{n}S_n)} \geq e^{tc'\ell m}\right) \leq \frac{\mathbb{E}[e^{t(c'T_m - \frac{m}{n}S_n)}]}{e^{tc'\ell m}}.$$

We will determine a suitable value for  $t$  so that the expectation is at most 1. Let  $\xi$  and  $\tau$  be Bernoulli variables with  $\mathbb{P}(\xi = 1) = p$  and  $\mathbb{P}(\tau = 1) = q$ . Then

$$(15) \quad \mathbb{E}[e^{t(c'T_m - \frac{m}{n}S_n)}] = \mathbb{E}(e^{tc'T_m})\mathbb{E}(e^{-t\frac{m}{n}S_n}) = [\mathbb{E}(e^{tc'\tau})]^m [\mathbb{E}(e^{-t\frac{m}{n}\xi})]^n.$$

For  $t > 0$  and  $s \in \mathbb{R}$  let  $\psi_t(s) = (1 - s + se^{c't})(1 - cs + cse^{-t})$ . Since  $p \geq cq$ ,

$$\mathbb{E}(e^{tc'\tau})\mathbb{E}(e^{-t\xi}) = (1 - q + qc^{c't})(1 - p + pe^{-t}) \leq \psi_t(q).$$

We have  $\psi_t(0) = 1$ , and  $\psi_t''(s) = 2c(e^{c't} - 1)(e^{-t} - 1) < 0$ , so that  $\psi_t$  is concave. For  $t_0 := (c' + 1)^{-1} \log(c/c')$ ,

$$\psi'_{t_0}(0) = e^{c't_0} - 1 + c(e^{-t_0} - 1) = \int_0^{t_0} e^{-u} [c'e^{(c'+1)u} - c] du < 0,$$

so that  $\psi_{t_0}(s) \leq 1$  for  $s \geq 0$ . Hence,

$$(16) \quad \mathbb{E}(e^{c't_0\tau})\mathbb{E}(e^{-t_0\xi}) \leq 1.$$

If  $m \leq n$ , then by Lyapunov's inequality,  $[\mathbb{E}(e^{-t_0\frac{m}{n}\xi})]^n \leq [\mathbb{E}(e^{-t_0\xi})]^m$ . Combining this inequality with (15) and (16) yields

$$\mathbb{E}[e^{t_0(c'T_m - \frac{m}{n}S_n)}] \leq [\mathbb{E}(e^{t_0c'\tau})]^m [\mathbb{E}(e^{-t_0\xi})]^m \leq 1,$$

and so, by (14),

$$\mathbb{P}\left(\frac{T_m}{m} \geq \frac{1}{c'} \frac{S_n}{n} + \ell\right) \leq e^{-t_0c'\ell m} = \left(\frac{c'}{c}\right)^{c'd/(c'+1)}.$$

If  $m > n$ , then Lyapunov's inequality gives  $[\mathbb{E}(e^{tc'\tau})]^m \leq [\mathbb{E}(e^{t\frac{m}{n}\tau})]^n$ . Setting  $t_1 = \frac{n}{m}t_0$ , we get in this case

$$\mathbb{E}[e^{t_1(c'T_m - \frac{m}{n}S_n)}] \leq [\mathbb{E}(e^{t_1c'\frac{m}{n}\tau})]^n [\mathbb{E}(e^{-t_1\frac{m}{n}\xi})]^n \leq 1,$$

and so

$$\mathbb{P}\left(\frac{T_m}{m} \geq \frac{1}{c'} \frac{S_n}{n} + \ell\right) \leq e^{-t_1c'\ell m} = \left(\frac{c'}{c}\right)^{c'd/(c'+1)}. \quad \square$$

*Proof of Lemma 2.* We will use a Poisson approximation to the binomial distribution. If  $W_\nu$  is a Poisson random variable with mean  $\nu > 0$ , then  $\mathbb{P}(W_\nu \leq M) \rightarrow 0$  as  $\nu \rightarrow \infty$ . Thus there exists  $N_0 \in \mathbb{N}$  so that  $\mathbb{P}(W_\nu \leq M) < \frac{1}{2}\epsilon$  for  $\nu > N_0$ . By [6], (43) on page 89,  $|\mathbb{P}_p(S_n \leq M) - \mathbb{P}(W_{np} \leq M)| \leq p$ . Thus if  $np \geq N_0$  and  $p \leq \frac{1}{2}\epsilon$ , then  $\mathbb{P}_p(S_n \leq M) \leq \epsilon$ . In particular, for  $p = \frac{1}{2}\epsilon$  and  $n = \lceil 2N_0/\epsilon \rceil$ , we have  $\mathbb{P}_{\epsilon/2}(S_{\lceil 2N_0/\epsilon \rceil} \leq M) \leq \epsilon$ .

On the other hand, if  $p > \frac{1}{2}\epsilon$  and  $n \geq 2N_0/\epsilon$ , then

$$\mathbb{P}_p(S_n \leq M) \leq \mathbb{P}_{\epsilon/2}(S_n \leq M) \leq \mathbb{P}_{\epsilon/2}(S_{\lceil 2N_0/\epsilon \rceil} \leq M) \leq \epsilon,$$

where we used the fact that the family of binomial distributions is stochastically increasing in both parameters, see e.g. [5], pages 67-70. The claim follows with  $N = 2N_0/\epsilon$ .  $\square$

#### REFERENCES

- [1] Dugundji J (1966) *Topology*. (Allyn and Bacon, Boston).
- [2] Lorentz GG (1986) *Bernstein Polynomials*. (Chelsea Publishing Company, New York).
- [3] Handelman D (1988) Representing polynomials by positive linear functions on compact convex polyhedra. *Pacific Journal of Mathematics* 132(1):35–62.
- [4] Powers V, Reznick B (2001) A new bound for Pólya’s theorem with applications to polynomials positive on polyhedra. *Journal of Pure and Applied Algebra* 164(1–2):221–229.
- [5] Lehmann EL, Romano JP (2005) *Testing Statistical Hypotheses*. (Springer Science & Business Media, New York).
- [6] Stein C (1986) *Approximate Computation of Expectations*, Lecture Notes-Monograph Series. (Institute of Mathematical Statistics, Hayward, CA) Vol. 7.
